# Supplementary material for: Effectiveness of Mind–Body Intervention for Inflammatory Conditions: Results from a 26-Week Randomized, Non-Blinded, Parallel-Group Trial
Source: MDPI journal article supplement (doi:10.3390/jcm10143107), 2021-07-14
Supplement: s1 [file s1]

# Supplementary Material: Effectiveness of Mind–Body Intervention for Inflammatory Conditions: Results from a 26-Week Randomized, Non-Blinded, Parallel-Group Trial

Thao Thi Nguyen, Christian G. Jensen, Lina Khoury, Bent Deleuran, Esther S. Blom, Thomas Breinholt, Robin Christensen and Lone Skov

**Table S1.** Values in each of the diagnoses: Psoriasis.

| LsMeans (SE) | Treatment as Usual Group |             |             | Mind-Body Intervention |             |             |
|--------------|--------------------------|-------------|-------------|------------------------|-------------|-------------|
|              | Week 0                   | Week 12     | Week 26     | Week 0                 | Week 12     | Week 26     |
| WHO-5        | 60.3 (3.6)               | 50.6 (4.5)  | 51.9 (4.6)  | 58.7 (3.6)             | 67.1 (4.6)  | 69.8 (5.0)  |
| SF-36 PCS    | 43.8 (1.9)               | 43.6 (2.4)  | 43.8 (2.4)  | 44.0 (1.9)             | 45.3 (2.7)  | 42.4 (2.7)  |
| SF-36 MCS    | 50.2 (1.7)               | 47.2 (2.2)  | 45.7 (2.2)  | 49.2 (1.7)             | 50.2 (2.4)  | 55.0 (2.4)  |
| SF-36 PF     | 78.9 (4.2)               | 75.2 (5.4)  | 72.2 (5.4)  | 79.0 (2)               | 79.8 (5.4)  | 83.1 (5.4)  |
| SF-36 RP     | 64.5 (8.4)               | 63.9 (10.9) | 59.9 (10.9) | 67.2 (8.5)             | 73.1 (11.0) | 60.6 (11.0) |
| SF-36 BP     | 62.0 (5.5)               | 65.8 (7.1)  | 72.3 (7.1)  | 65.7 (5.5)             | 69.8 (7.1)  | 74.1 (7.1)  |
| SF-36 GH     | 52.0 (3.7)               | 53.4 (4.7)  | 46.3 (4.7)  | 51.4 (3.7)             | 56.8 (5.2)  | 60.2 (5.2)  |
| SF-36 VT     | 55.6 (4.7)               | 45.1 (6.1)  | 46.8 (6.1)  | 54.3 (4.7)             | 53.9 (6.6)  | 58.2 (6.6)  |
| SF-36 SF     | 80.6 (4.9)               | 71.3 (6.3)  | 74.9 (6.2)  | 79.6 (4.8)             | 79.8 (6.2)  | 77.7 (6.2)  |
| SF-36 RE     | 76.7 (7.2)               | 71.2 (9.3)  | 56.7 (9.3)  | 66.4 (7.3)             | 78.3 (9.5)  | 100.5 (9.5) |
| SF-36 MH     | 77.7 (2.5)               | 73.1 (3.2)  | 70.1 (3.2)  | 77.5 (2.5)             | 77.6 (3.6)  | 82.0 (3.6)  |

**Table S2.** Values in each of the diagnoses: Rheumatoid arthritis.

| LsMeans (SE) | Treatment as Usual Group |            |             | Mind-Body Intervention |             |             |
|--------------|--------------------------|------------|-------------|------------------------|-------------|-------------|
|              | Week 0                   | Week 12    | Week 26     | Week 0                 | Week 12     | Week 26     |
| WHO-5        | 60.2(4.2)                | 62.4(4.2)  | 67.0 (4.5)  | 59.0(4.2)              | 68.7 (4.2)  | 68.5 (4.5)  |
| SF-36 PCS    | 43.5(2.2)                | 42.5(2.2)  | 35.5 (2.4)  | 43.7(2.2)              | 47.5 (2.2)  | 46.7 (2.4)  |
| SF-36 MCS    | 48.3(2.0)                | 55.0(2.0)  | 55.7 (2.2)  | 50.6(2.0)              | 51.2 (2.0)  | 52.3 (2.2)  |
| SF-36 PF     | 79.0(5.0)                | 77.4 (5.0) | 63.0 (5.4)  | 79.2(5.1)              | 84.9 (5.1)  | 83.4 (5.4)  |
| SF-36 RP     | 61.6(10.1)               | 63.2(10.1) | 49.4 (11.0) | 62.9(10.1)             | 91.4 (10.1) | 72.9 (10.9) |
| SF-36 BP     | 61.9 (6.5)               | 66.3 (6.5) | 45.9 (7.1)  | 64.6 (6.5)             | 71.4 (6.5)  | 70.4 (7.1)  |
| SF-36 GH     | 51.0 (4.4)               | 56.9 (4.4) | 51.7 (4.8)  | 52.1 (4.4)             | 56.3 (4.4)  | 60.7 (4.7)  |
| SF-36 VT     | 54.4 (5.6)               | 50.2 (5.6) | 43.6 (6.1)  | 53.9 (5.6)             | 65.5 (5.6)  | 63.3 (6.1)  |
| SF-36 SF     | 75.0 (5.9)               | 87.1 (5.9) | 83.0 (6.4)  | 78.2 (5.8)             | 85.0 (5.8)  | 86.3 (6.2)  |
| SF-36 RE     | 68.7 (8.6)               | 96.5 (8.6) | 86.4 (9.2)  | 79.8 (8.7)             | 76.7 (8.7)  | 81.1 (9.4)  |
| SF-36 MH     | 77.6 (3.0)               | 81.9 (3.0) | 83.2 (3.3)  | 78.1 (3.1)             | 78.4 (3.1)  | 80.3 (3.3)  |

Abbreviations: LsMeans, least-squares means; WHO-5, The World Health Organisation- Five Well-Being Index; SF-36 PCS, Medical Outcomes Study 36-Item Short-Form Health Survey, Physical Component Summary; SF-36 MCS, Medical Outcomes Study 36-Item Short-Form Health Survey, Mental Component Summary; SF-36 PF, Medical Outcomes Study 36-Item Short-Form Health Survey, Physical Function; SF-36 RP, Medical Outcomes Study 36-Item Short-Form Health Survey, Role Physical; SF-36 BP, Medical Outcomes Study 36-Item Short-Form Health Survey, Bodily Pain; SF-36 GH, Medical Outcomes Study 36-Item Short-Form Health Survey, Global Health; SF-36 VT, Medical Outcomes Study 36-Item Short-Form Health Survey, Vitality; SF-36 SF, Medical Outcomes Study 36-Item Short-Form Health Survey, Social Function; SF-36 RE, Medical Outcomes Study 36-Item Short-Form Health Survey, Role Emotional; SF-36 MH, Medical Outcomes Study 36-Item Short-Form Health Survey, Mental Health.
